# Supplementary material
Source: MDPI journal article supplement (https://www.mdpi.com/2073-4344/13/4/706)
Supplement: s1 [file s1]

## Supplementary Materials

### Air-stable efficient nickel catalyst for hydrogenation of organic compounds

Vladyslav V. Subotin<sup>1,2</sup>, Mykyta O. Ivanytsya<sup>1,2</sup>, Anastasiya V. Terebilenko<sup>1,3</sup>, Pavel S. Yaremov<sup>1</sup>, Olena O. Pariiska<sup>1</sup>, Yuri M. Akimov<sup>3</sup>, Igor E. Kotenko<sup>1,4</sup>, Tomash M. Sabov<sup>5</sup>, Mykhailo M. Kurmach<sup>1</sup>, Sergey V. Ryabukhin<sup>2,6,7</sup>, Dmitriy M. Volochnyuk<sup>2,6,7</sup>, Sergey V. Kolotilov<sup>1\*</sup>

<sup>1</sup> L.V. Pisarzhevskii Institute of Physical Chemistry of the National Academy of Sciences of Ukraine, prosp. Nauky 31, Kyiv, 03028, Ukraine; s.v.kolotilov@gmail.com

<sup>2</sup> Enamine Ltd., Chervonotkatska Street 78, Kyiv 02094, Ukraine; vladyslav.s.w@gmail.com

<sup>3</sup> Laboratory of electron microscopy, M.G. Kholodny Institute of Botany of the National Academy of Sciences of Ukraine, Tereshchenkivska str. 2, 01601, Kyiv, Ukraine; yuri.akimov@gmail.com.

<sup>4</sup> National Technical University of Ukraine "Igor Sikorsky Kyiv Polytechnic Institute", 37 Peremogy ave., Kyiv, 03056, Ukraine; 2921081@gmail.com

<sup>5</sup> V. Lashkaryov Institute of Semiconductors Physics of the National Academy of Sciences in Ukraine, prosp. Nauky 41, Kyiv, 03028, Ukraine; tsabov92@gmail.com

<sup>6</sup> Institute of high technologies, Taras Shevchenko National University of Kyiv, Volodymyrska Street 60, Kyiv 01601, Ukraine; s.v.ryabukhin@gmail.com

<sup>7</sup> Institute of Organic Chemistry, National Academy of Sciences of Ukraine, Murmanska Street 5, Kyiv 02660, Ukraine; d.volochnyuk@gmail.com

\* Correspondence: s.v.kolotilov@gmail.com

#### Method for synthesis of Ni(cod)<sub>2</sub>.

The method is based on [Krysan, D. J.; Mackenzie, P. B.; A new, convenient preparation of bis (1, 5-cyclooctadiene) nickel (0). *J. Org. Chem.*, **1990**, 55 (13), 4229-4230. DOI: 10.1021/jo00300a057]

To 500-ml three-necked flask, equipped with a thermometer and dropping funnel, bis(acetylacetonate)nickel(II) (14.01 g, 54.53 mmol), cyclooctadiene (24 ml, 195.67 mmol), and 75 ml of THF were added. The mixture was backfilled with argon 3 times and cooled to -78 °C. Then 1.0 M solution of diisobutylaluminum hydride in hexane (150 ml, 150 mmol) was introduced to the dropping funnel via a cannula. The brown suspension was slowly warmed to 0 °C. Then 150 ml of degassed MTBE was added and temperature was decreased to 78 °C and held for 3 hours for complete precipitation of the product. The resulting precipitate was filtered on a Schlenck filter tube under an inert atmosphere and washed with 30 ml of degassed MTBE until all colored residues are removed. The resulting light-yellow powder was dried in vacuo to obtain of Ni(cod)<sub>2</sub> (9.95 g, 66 %).

Table S1. The atomic concentrations of the elements found by XPS and calculated from the survey spectra (atomic %)

| Sample                                              | Content of element, atomic % |       |      |                    |
|-----------------------------------------------------|------------------------------|-------|------|--------------------|
|                                                     | C                            | O     | Ni   | N                  |
| Ni/C-3                                              | 77.69                        | 17.23 | 5.08 | -                  |
| Ni/C-3 after the catalytic experiment <sup>a)</sup> | 91.11                        | 7.03  | 1.26 | 0.6 <sup>b)</sup>  |
| Ni/C-3 after 6 cycles of the catalytic experiment   | 89.22                        | 7.75  | 1.34 | 1.69 <sup>b)</sup> |

a) hydrogenation of quinoline (T = 100 °C, p(H<sub>2</sub>) = 100 atm, 24 h, methanol)

b) N of adsorbed quinoline or 1,2,3,4-tetrahydroquinoline

Table. S2 The results of analysis of the composites by CO chemisorption using extrapolation to zero pressure model

| Composite | Ni content, % | S <sub>Ni</sub> , m <sup>2</sup> /g(Ni) | Dispersion <sup>(a)</sup> , % | d <sub>Ni</sub> , nm |
|-----------|---------------|-----------------------------------------|-------------------------------|----------------------|
| Ni/C-1    | 0.9           | 863                                     | 100                           | 0.8                  |
| Ni/C-3    | 2.8           | 341                                     | 52                            | 2.0                  |
| Ni/C-5    | 4.5           | 362                                     | 54                            | 1.9                  |
| Ni/C-10   | 9.1           | 82                                      | 12                            | 8.2                  |

<sup>(a)</sup> dispersion = N(adsorbing Ni atoms)/N(total Ni atoms)

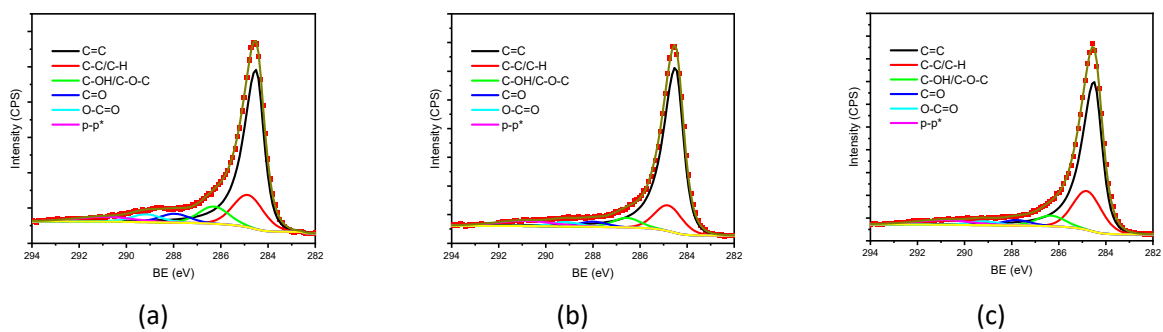

**Figure S1.** 1s X-ray photoelectron spectra of Ni/C-3 composite (a), and the same sample after catalytic experiment on hydrogenation of quinoline (T = 100 °C, p(H<sub>2</sub>) = 100 atm, 24 h, methanol) (b) and after 6 cycles of the same catalytic experiments (c).

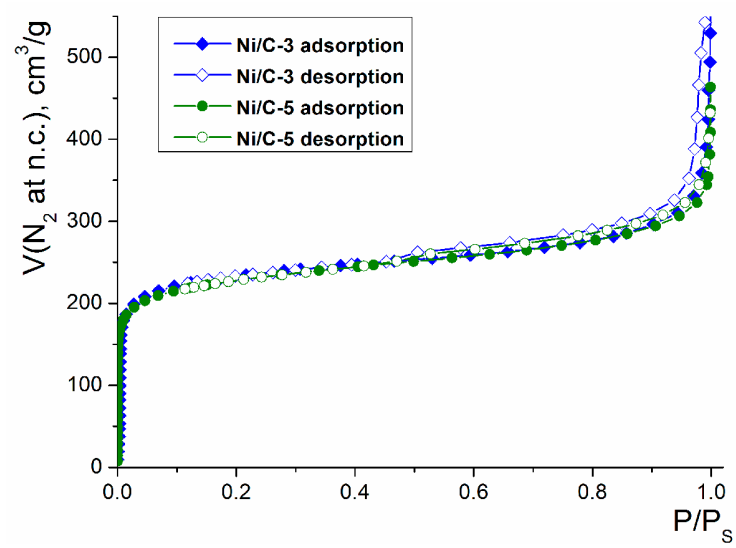

**Figure S2.** N<sub>2</sub> adsorption isotherms for samples Ni/C-3 and Ni/C-5

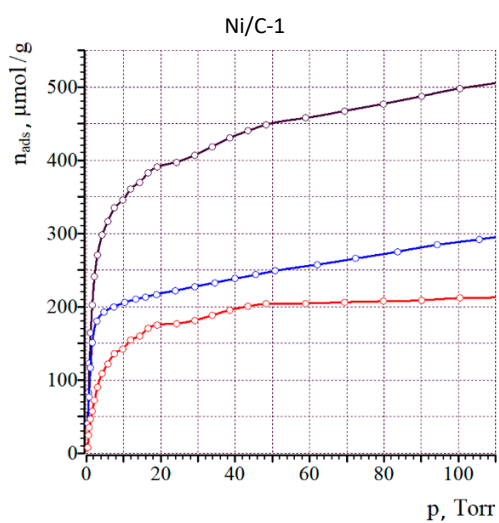

(a)

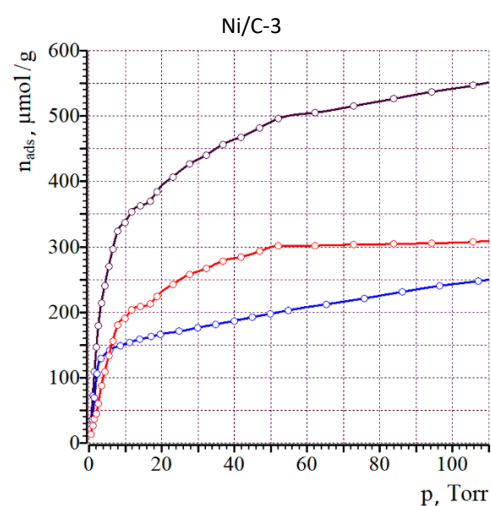

(b)

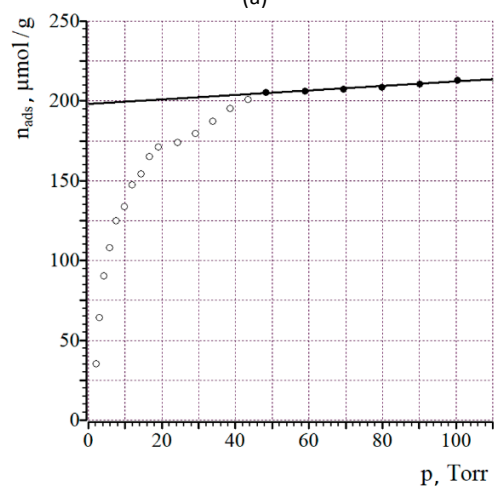

(c)

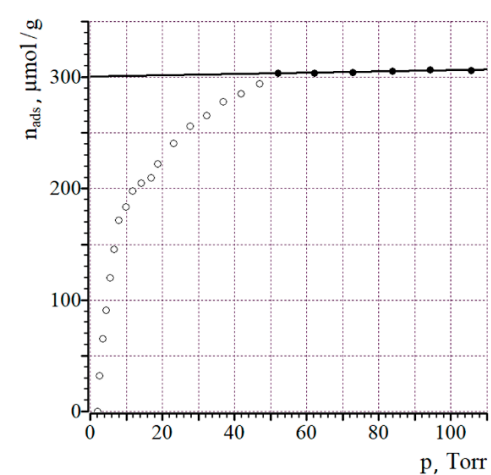

(d)

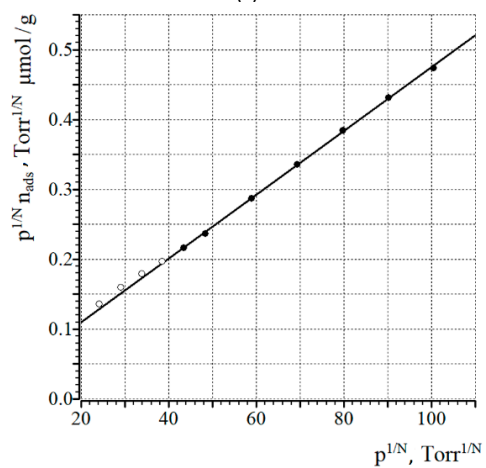

(e)

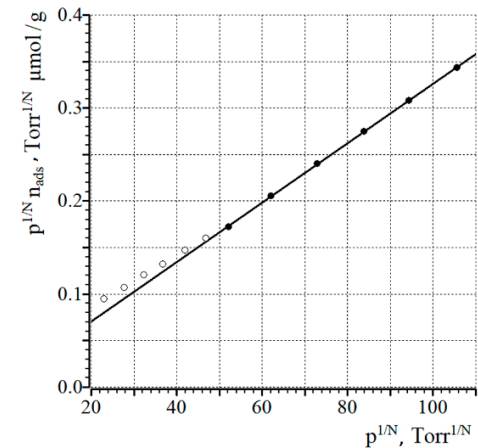

(f)

**Figure S3.** Isotherms of CO sorption (1<sup>st</sup> run – black, 2<sup>nd</sup> run – red, difference isotherm - blue) (a, b), the fit in the model of extrapolation to zero pressure (c, d) and the fit in the model of Langmuir adsorption, where  $N$  is the dissociation stoichiometry coefficient,  $N=1$  for this case (e, f) for Ni/C-1 (left column) and Ni/C-3 (right column). On Figures c-f, filled symbols indicate those, which were used for linear fit.

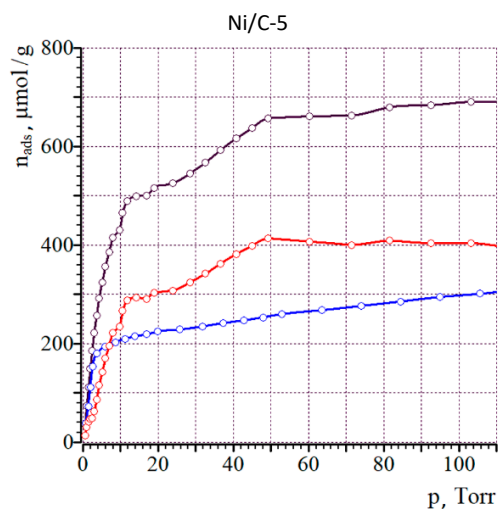

(a)

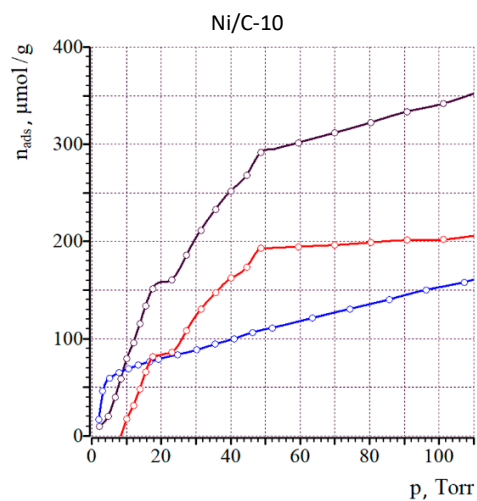

(b)

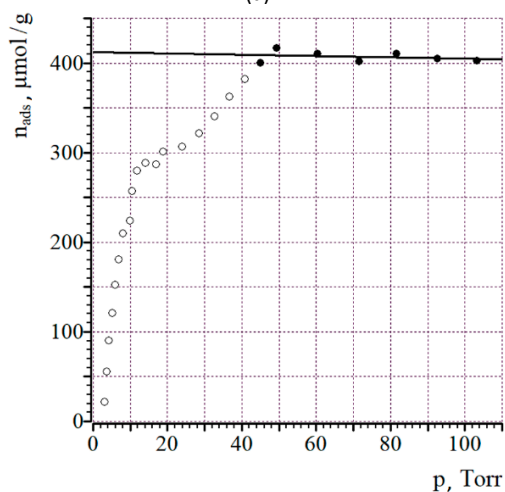

(c)

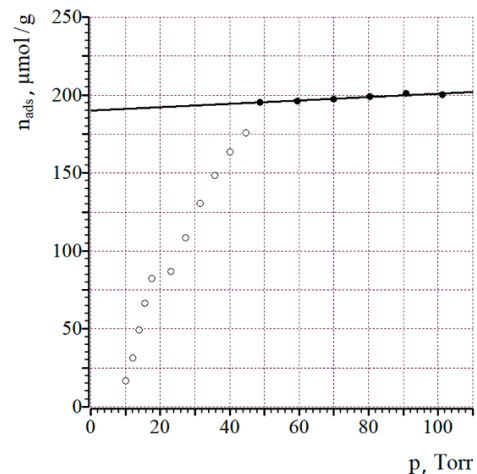

(d)

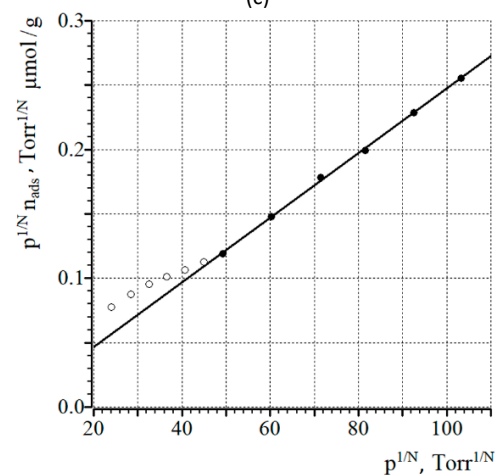

(e)

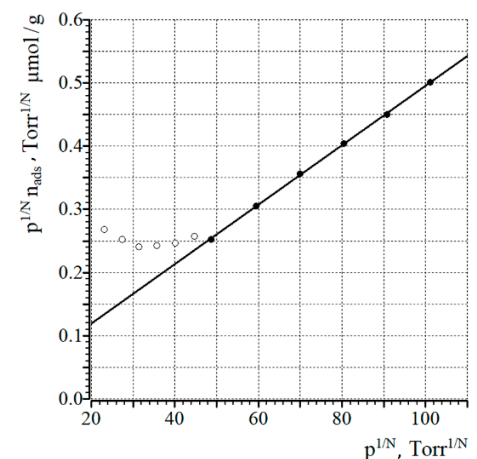

(f)

**Figure S4.** Isotherms of CO sorption (1<sup>st</sup> run – black, 2<sup>nd</sup> run – red, difference isotherm - blue) (a, b), the fit in the model of extrapolation to zero pressure (c, d) and the fit in the model of Langmuir adsorption, where N

is the dissociation stoichiometry coefficient,  $N=1$  for this case (e, f) for Ni/C-5 (left column) and Ni/C-10 (right column). On Figures c-f, filled symbols indicate those, which were used for linear fit.

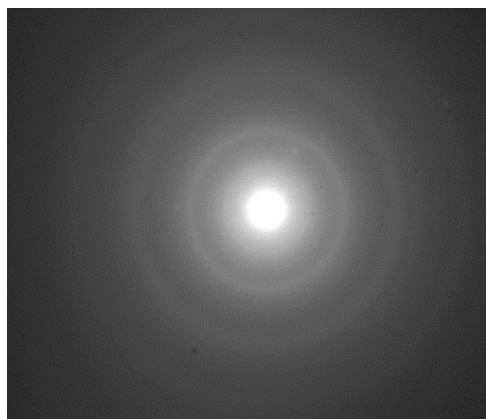

(a)

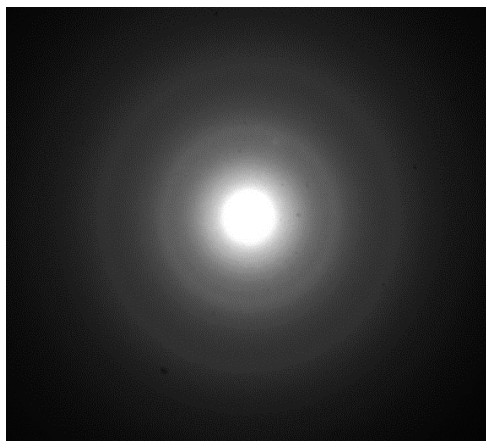

(b)

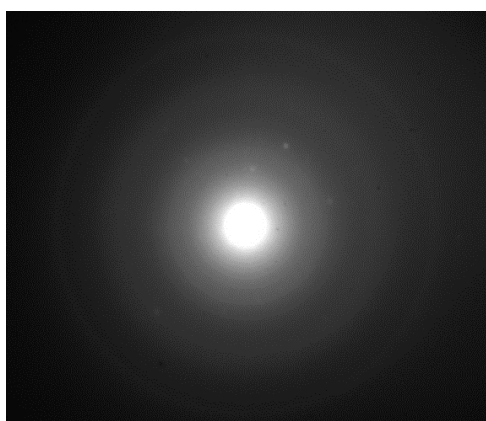

(c)

**Figure S5.** Electron diffraction patterns of composites Ni/C-3 (a), Ni/C-5 (b) and Ni/C-10 (c) after reduction with  $H_2$  and experiments on chemisorption of CO.

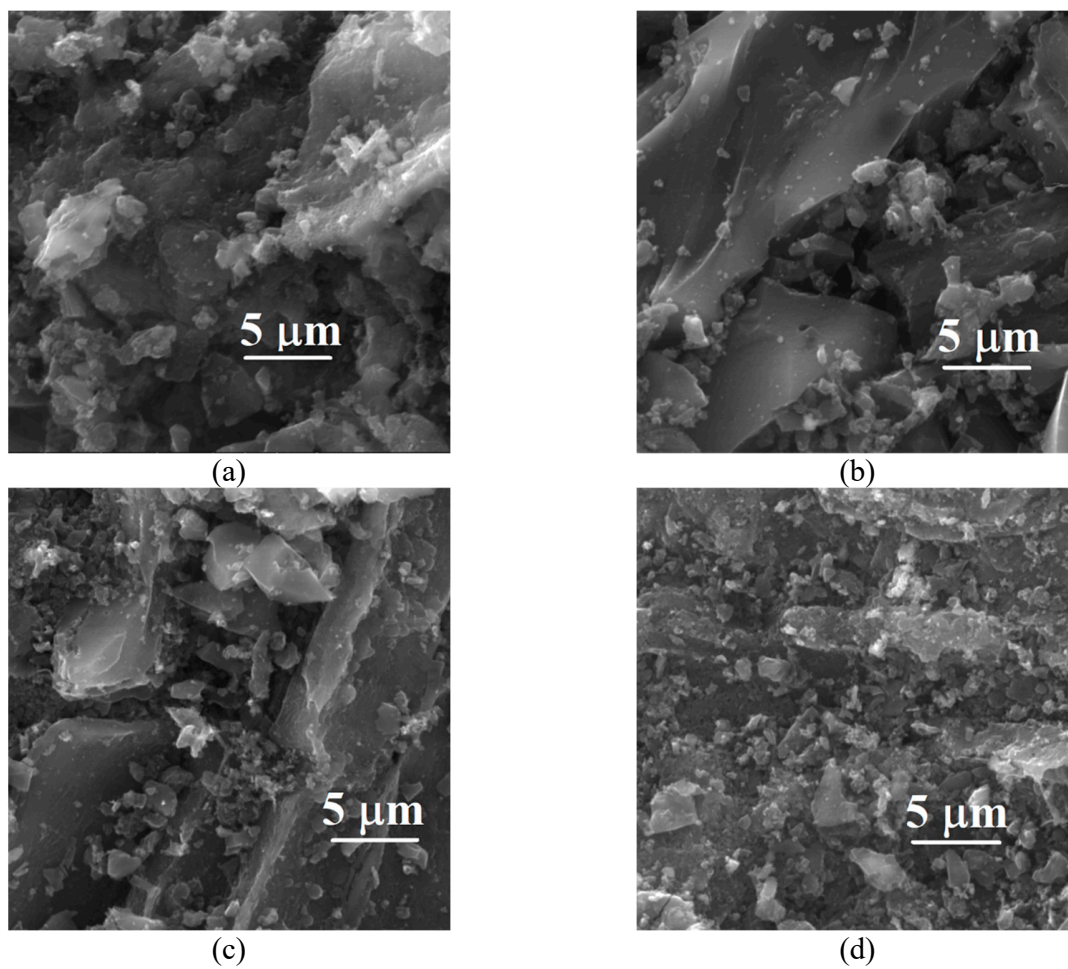

**Figure S6.** SEM images of Ni/C-1 (a), Ni/C-3 (b), Ni/C-5 (c) and Ni/C-10 (d) composites after catalytic hydrogenation of quinoline at 100 °C,  $p(\text{H}_2) = 100$  atm in methanol for 24 h.



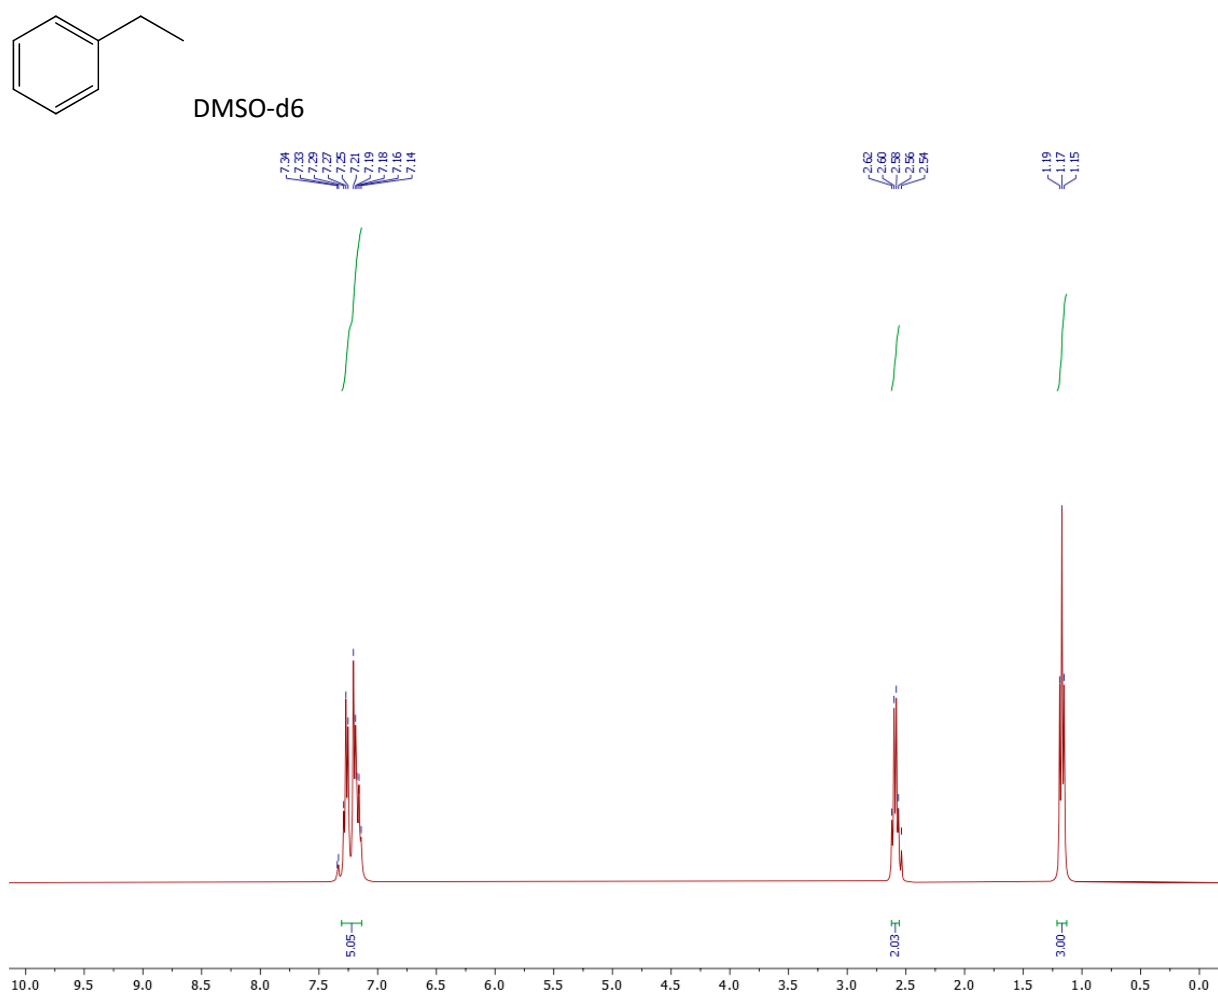

Figure S7.  $^1\text{H}$  NMR spectrum of ethylbenzene

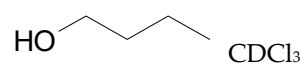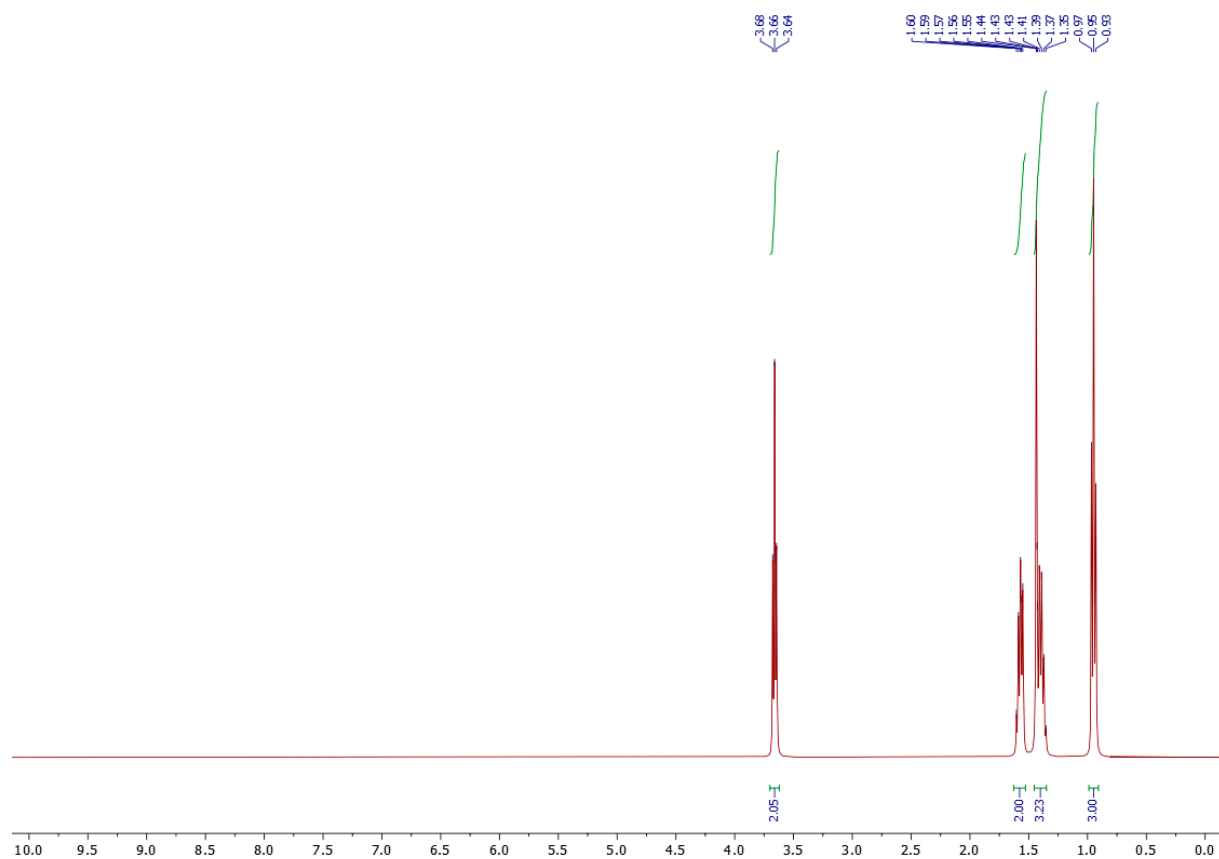

Figure S8. <sup>1</sup>H NMR spectrum of butan-1-ol

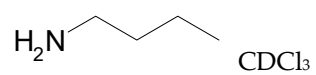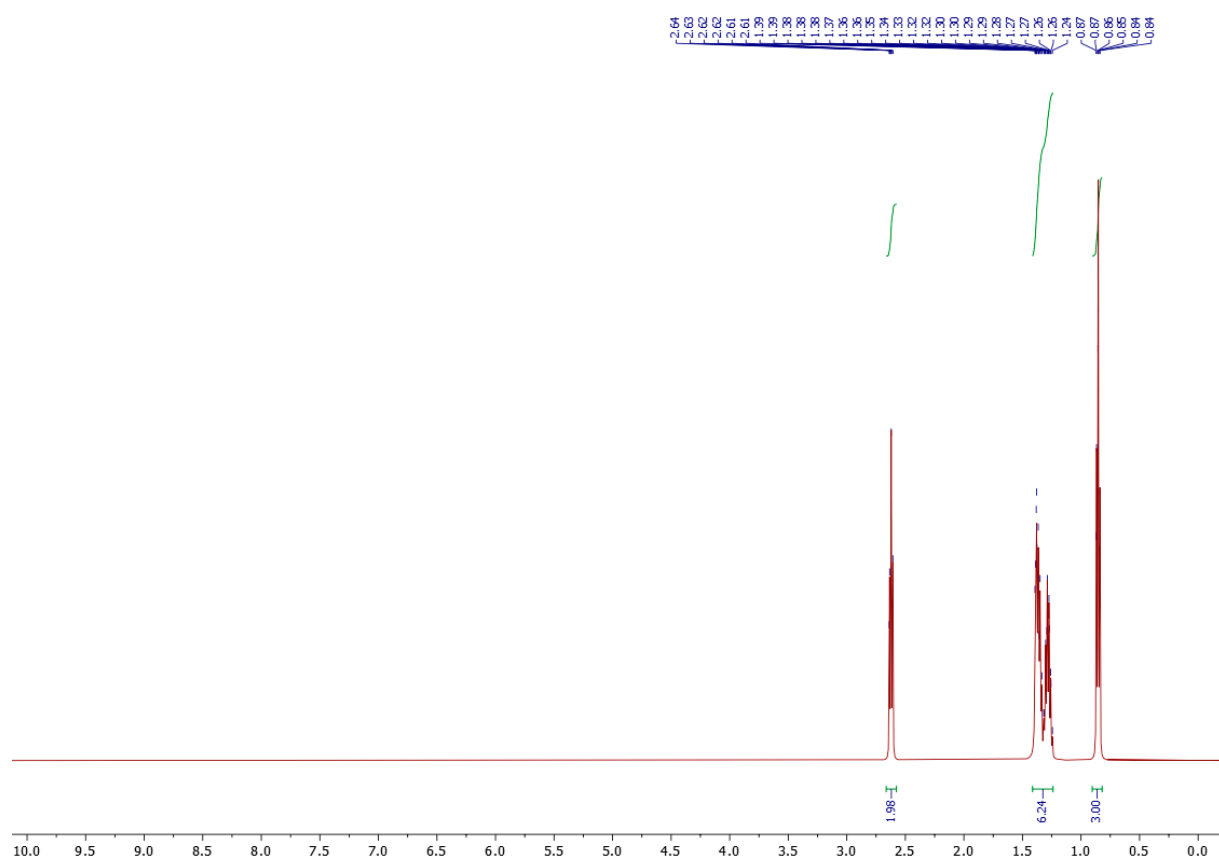

Figure S9.  $^1\text{H}$  NMR spectrum of butan-1-amine

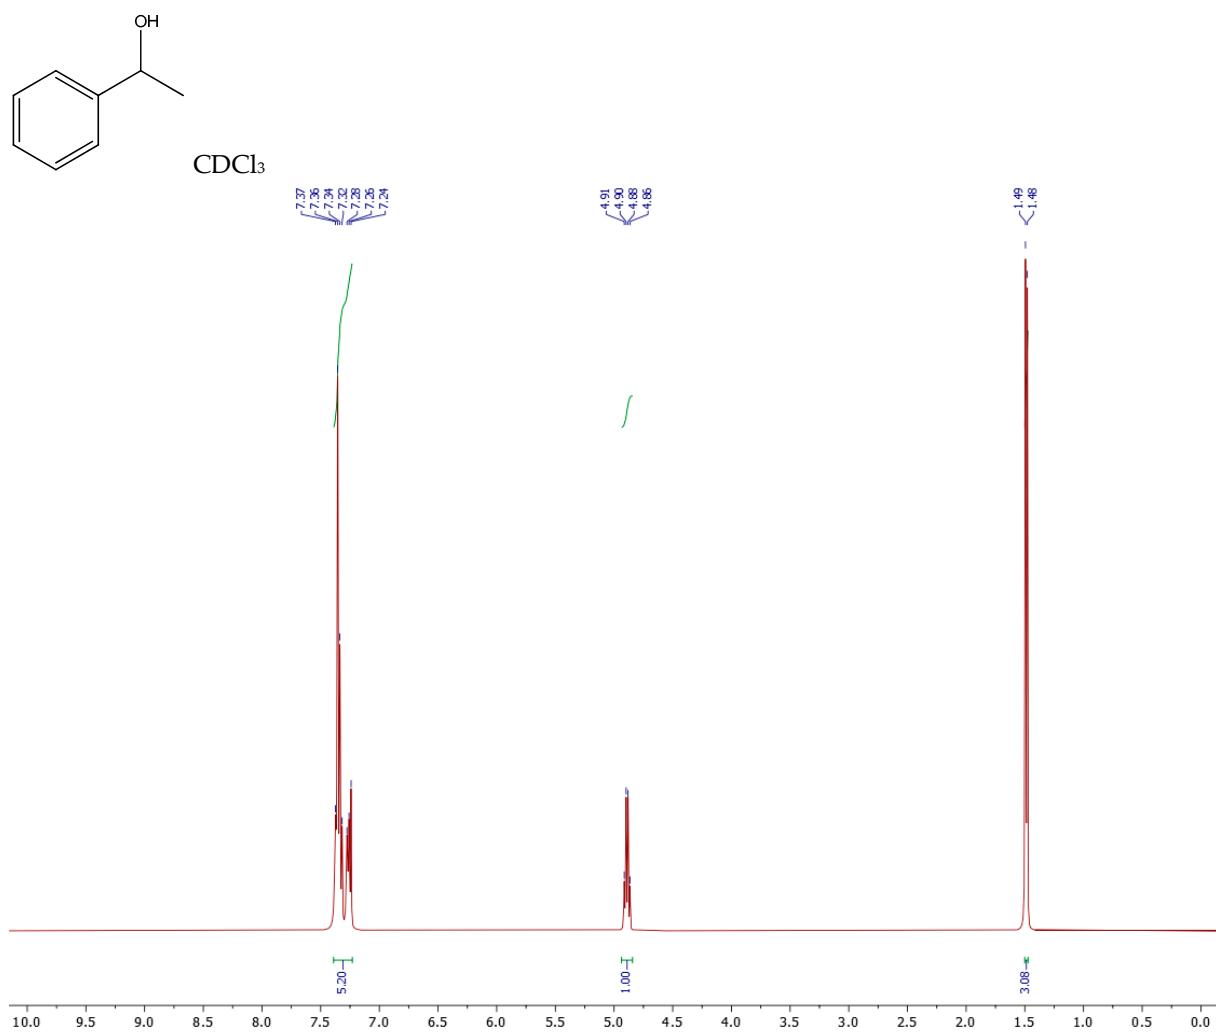

Figure S10.  $^1\text{H}$  NMR spectrum of 1-phenylethanol

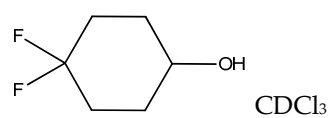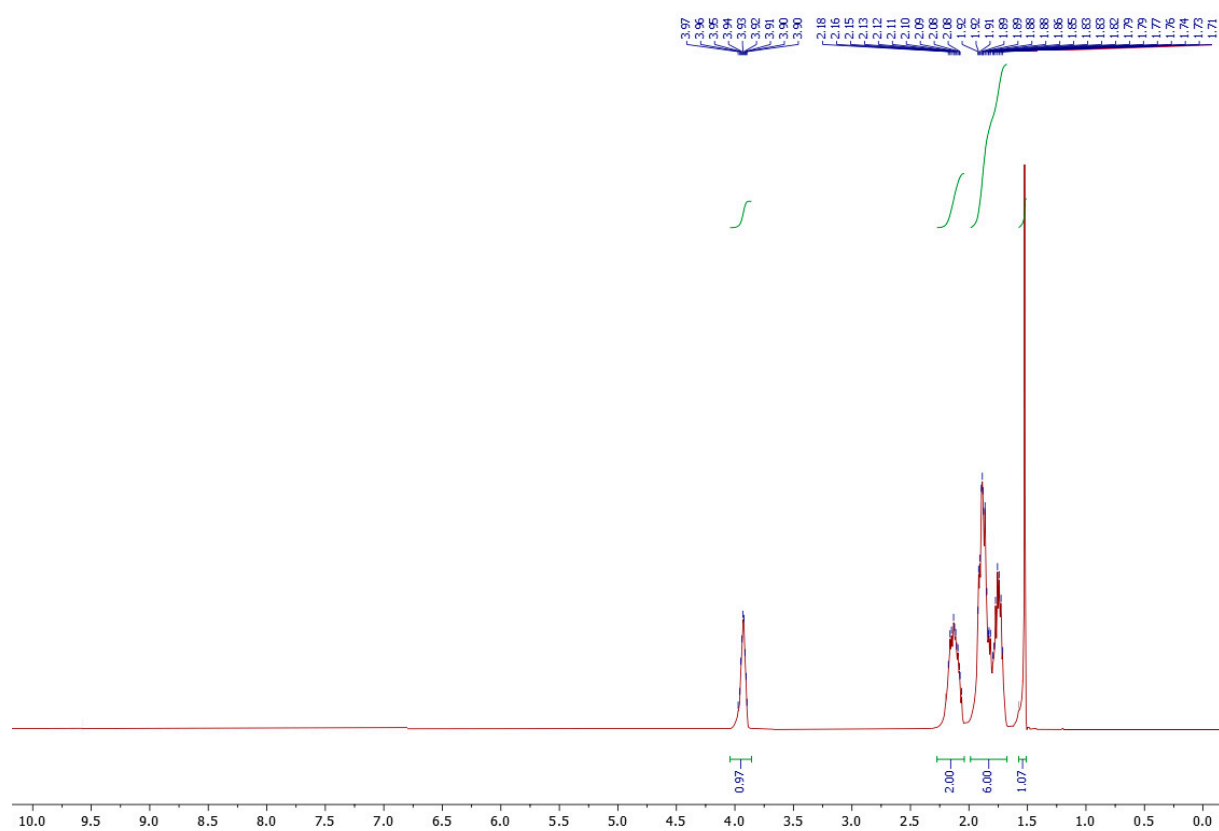

Figure S11.  $^1\text{H}$  NMR spectrum of 4,4-difluorocyclohexanol

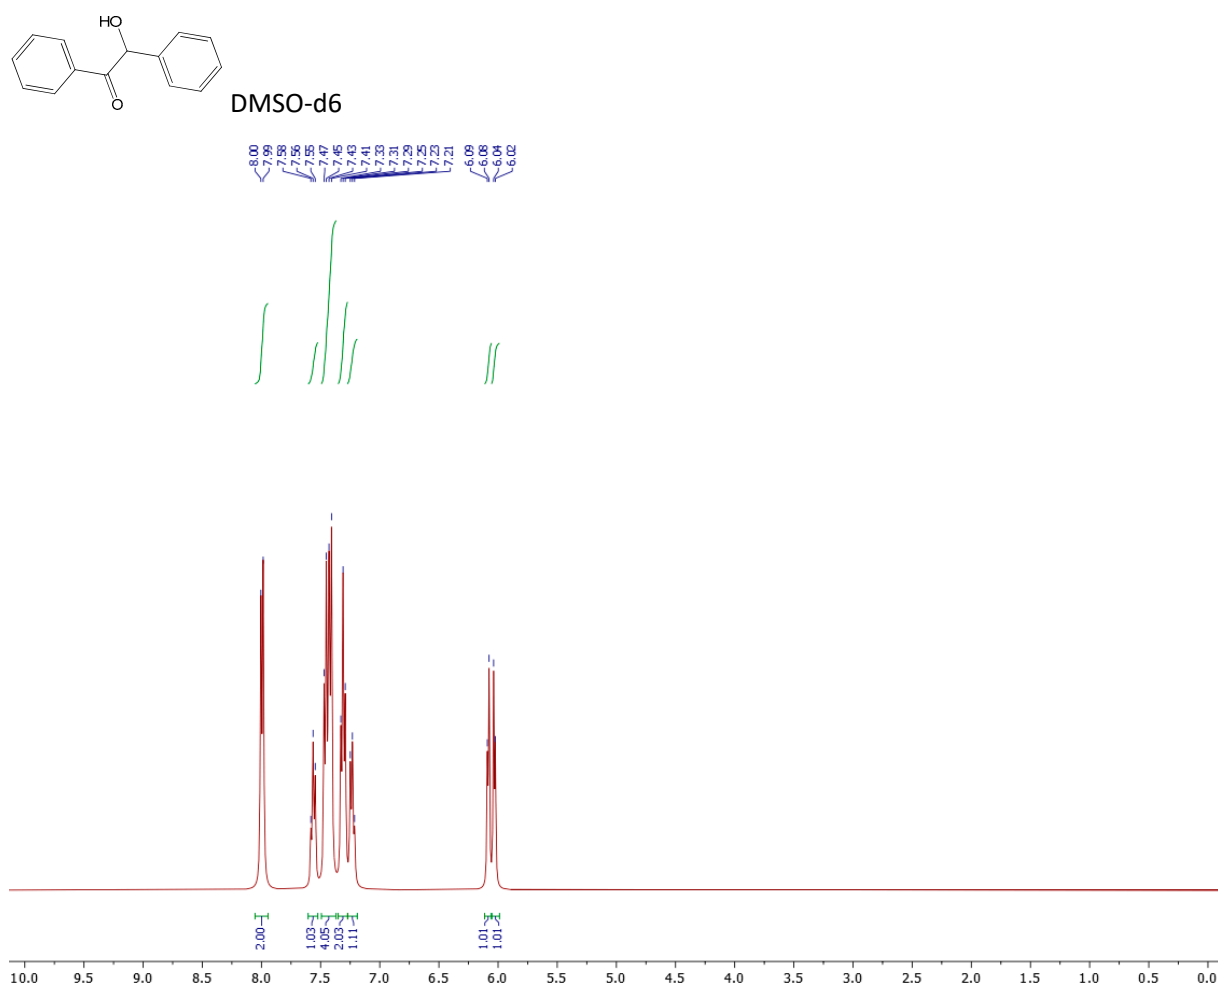

Figure S12.  $^1\text{H}$  NMR spectrum of 2-hydroxy-1,2-diphenylethanone

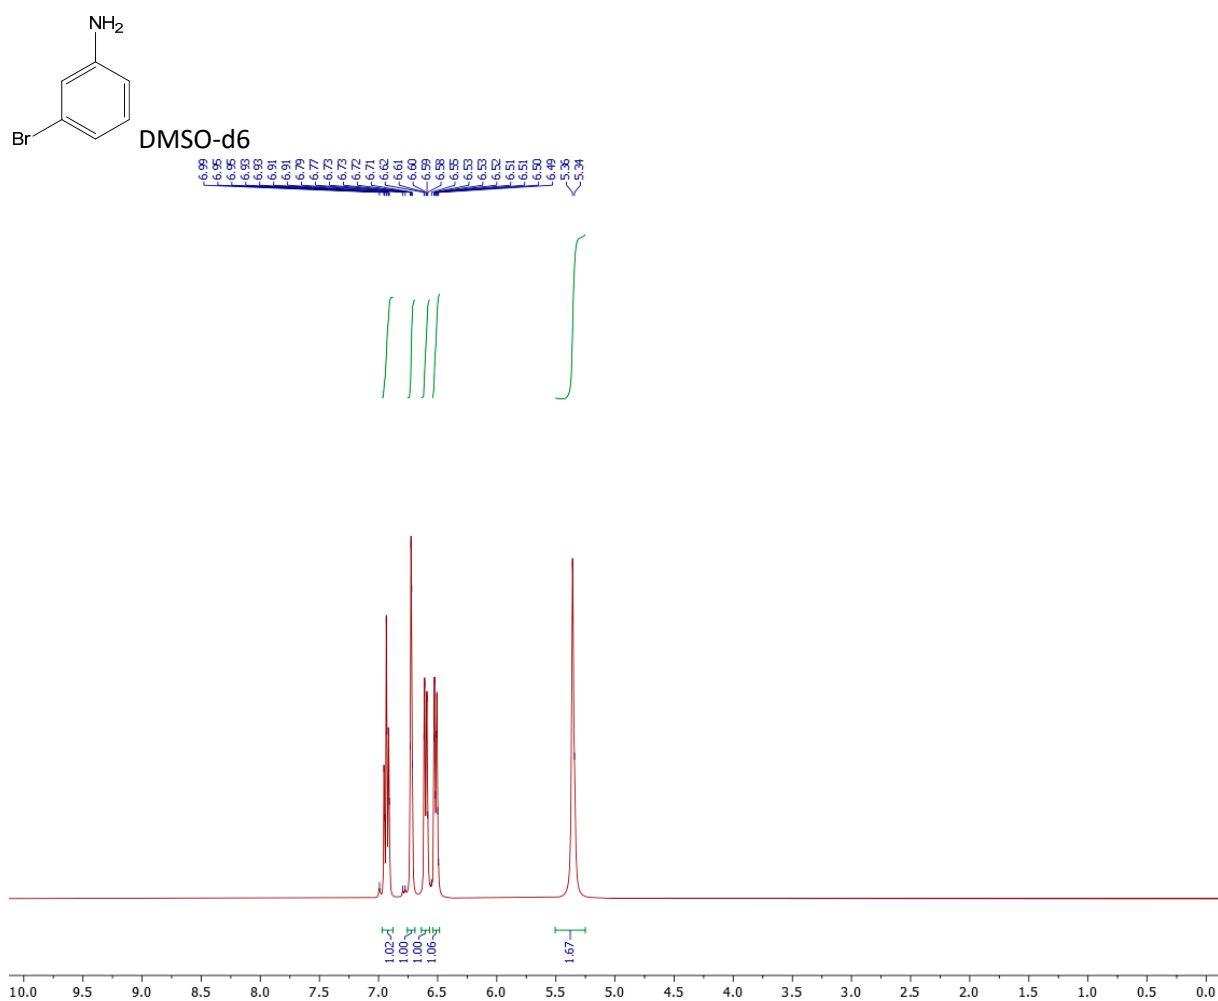

Figure S13.  $^1\text{H}$  NMR spectrum of 3-bromoaniline

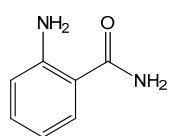

DMSO-d6

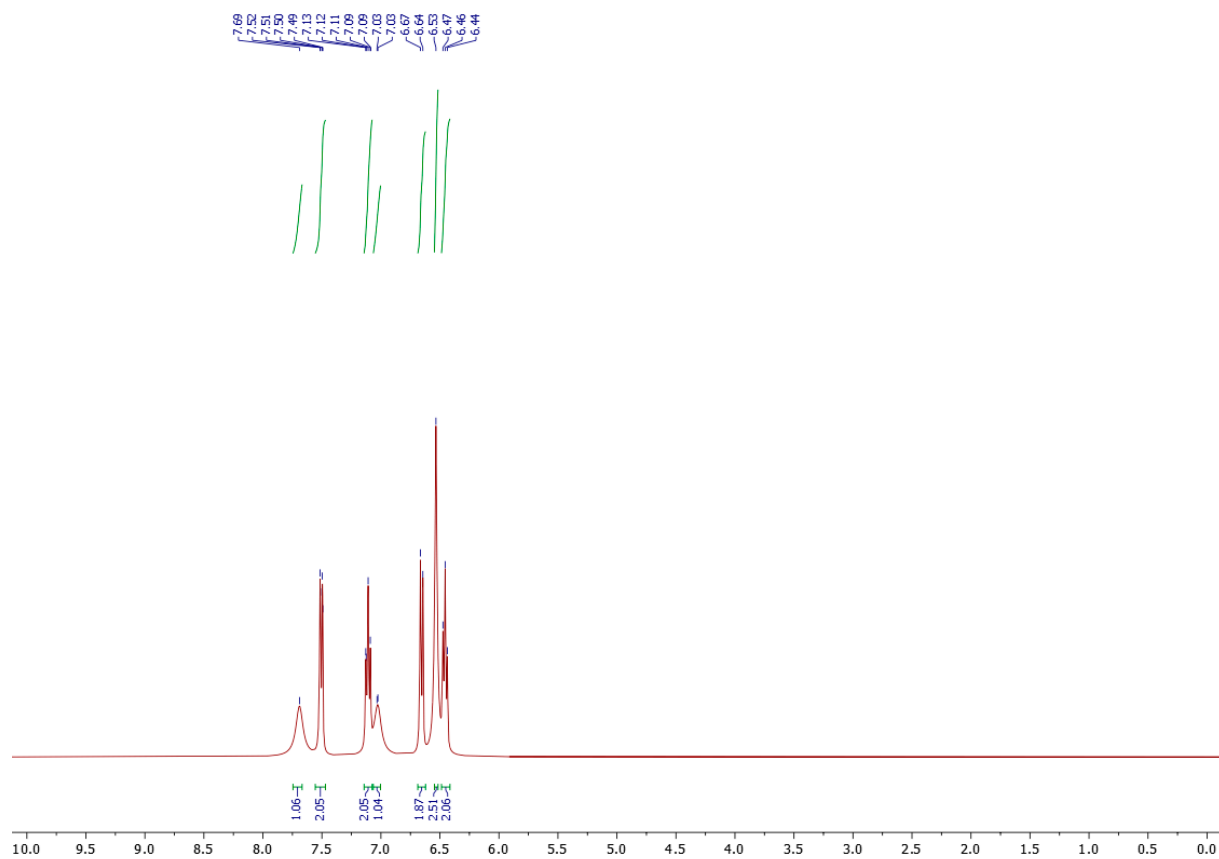

Figure S14. <sup>1</sup>H NMR spectrum of 2-aminobenzamide



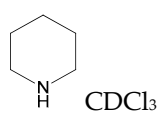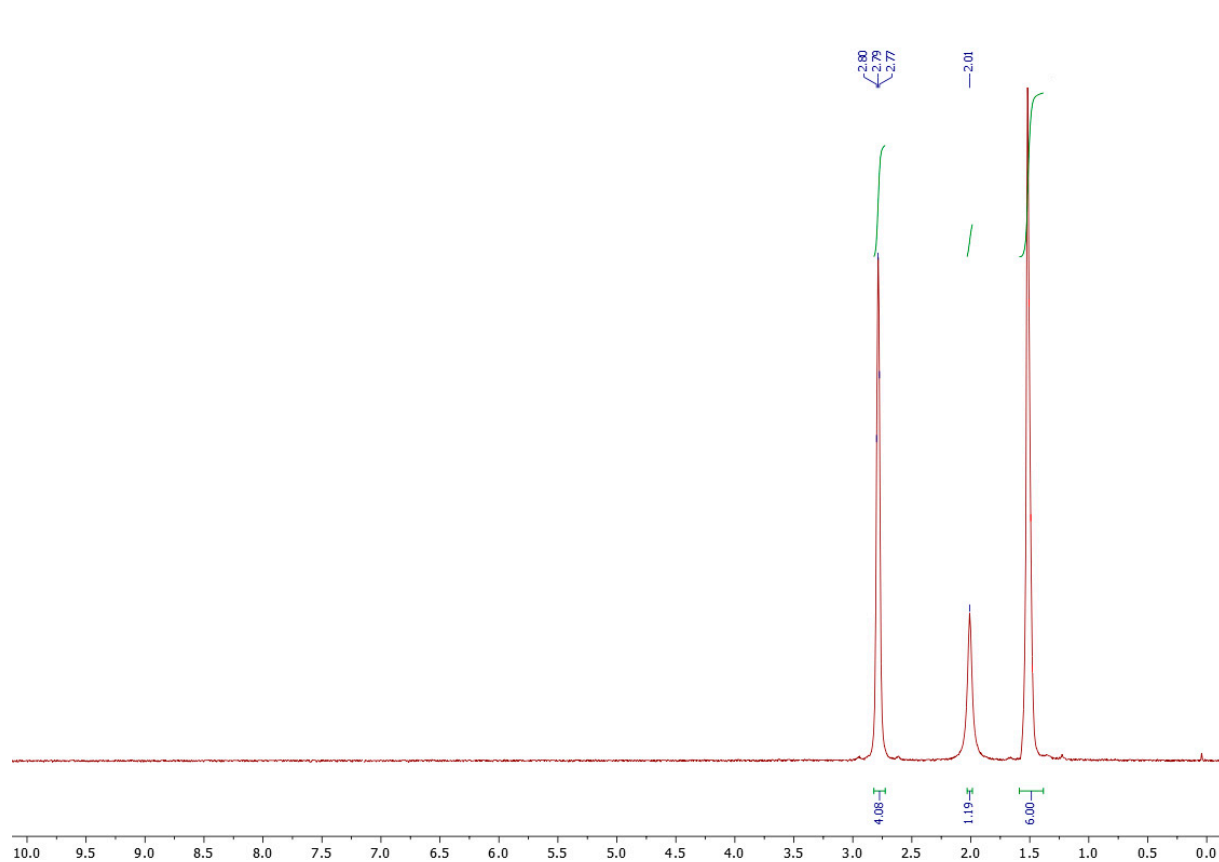

Figure S15. <sup>1</sup>H NMR spectrum of piperidine.

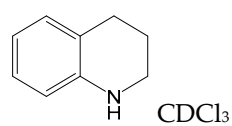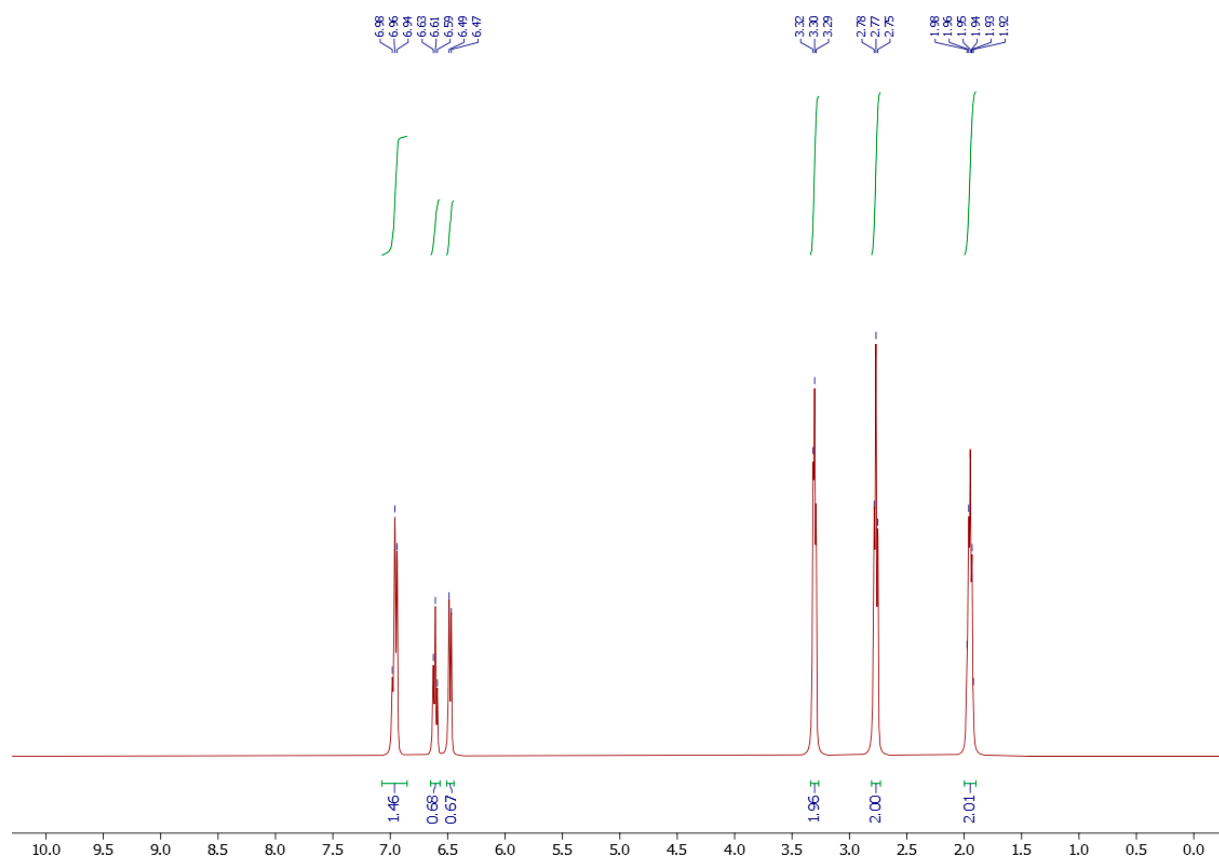

Figure S16. <sup>1</sup>H NMR spectrum of 1,2,3,4-tetrahydroquinoline

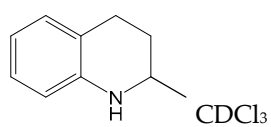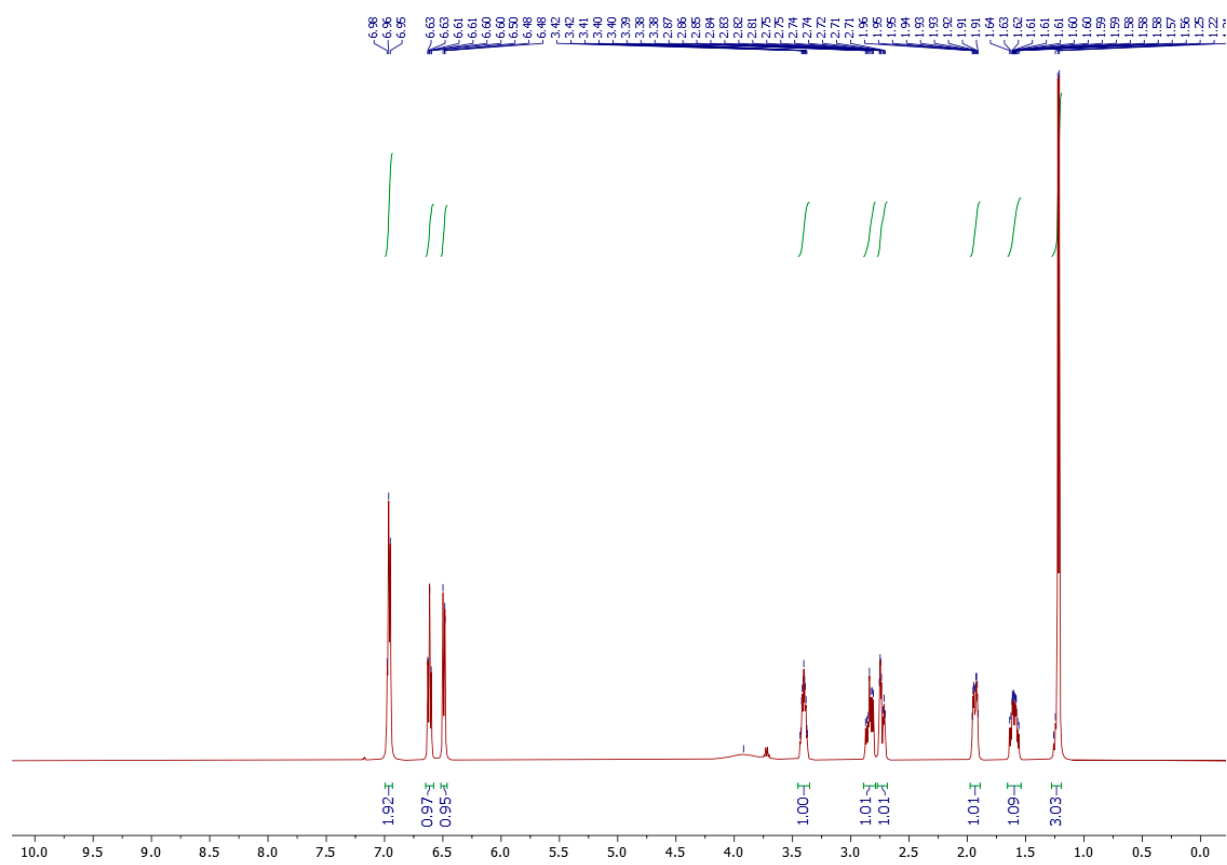

Figure S17. <sup>1</sup>H NMR spectrum of 2-methyl-1,2,3,4-tetrahydroquinoline

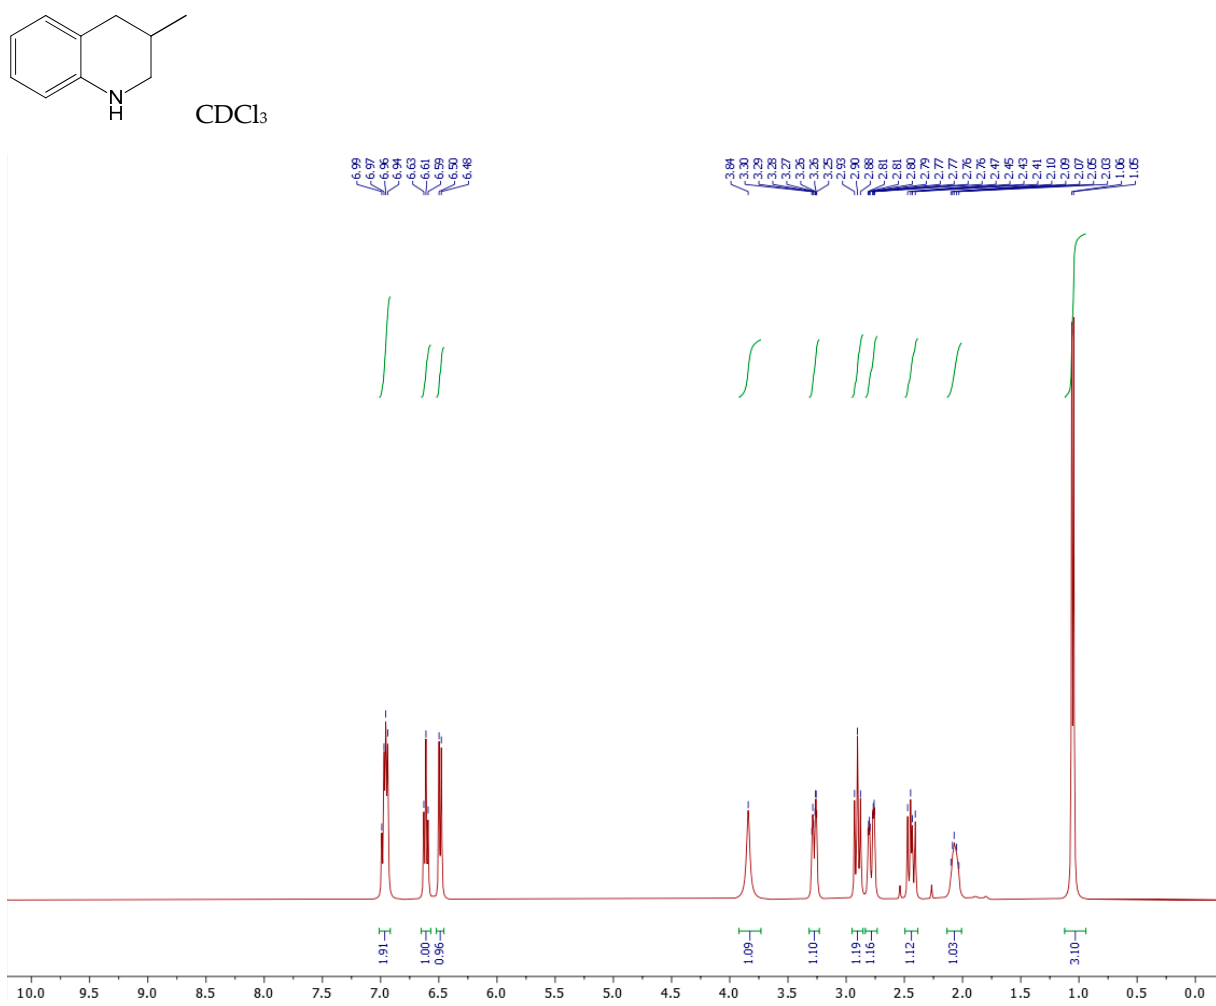

Figure S18.  $^1\text{H}$  NMR spectrum of 3-methyl-1,2,3,4-tetrahydroquinoline

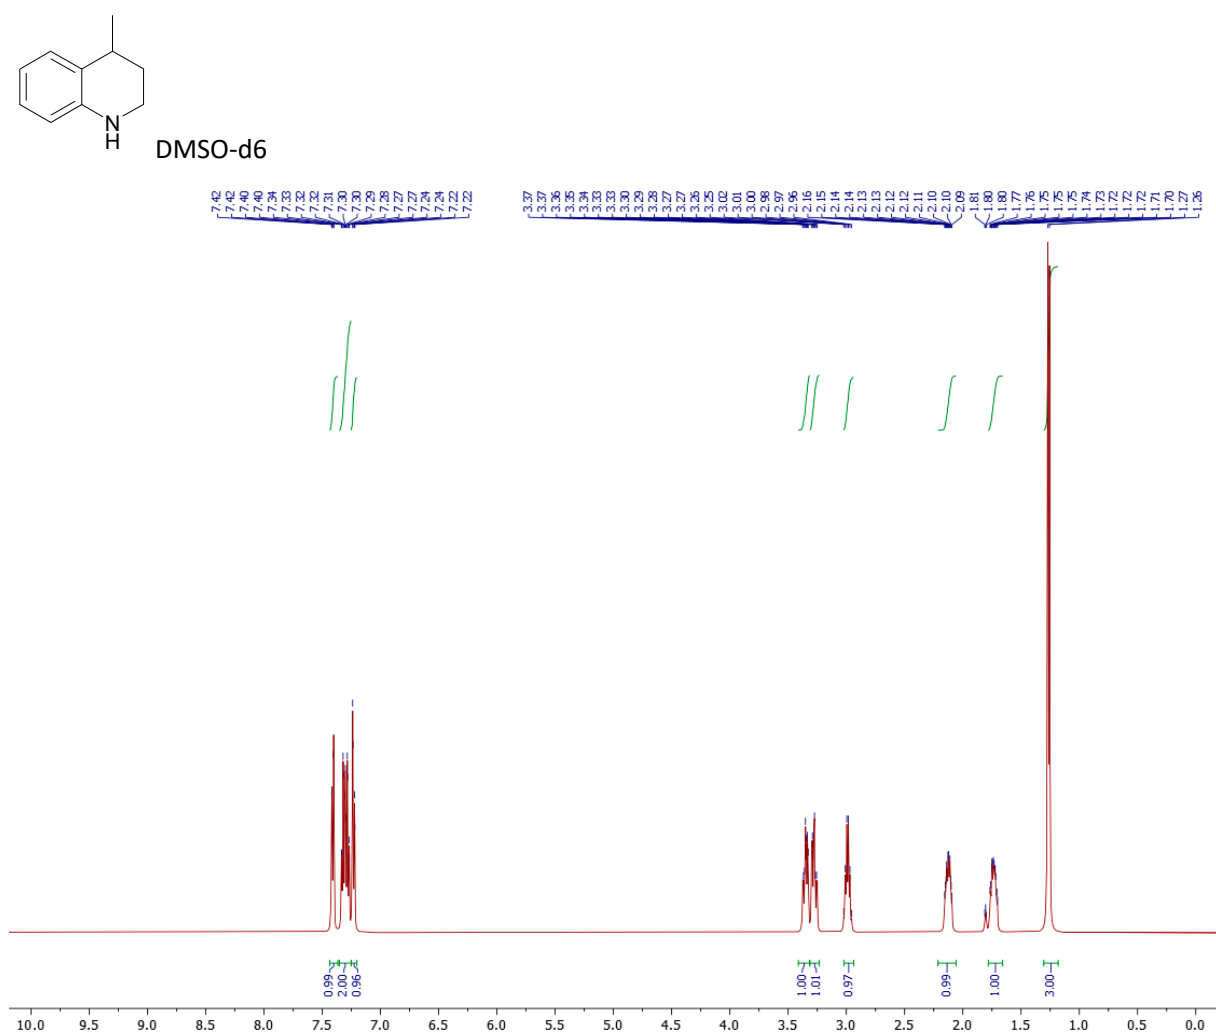

Figure S19. <sup>1</sup>H NMR spectrum of 4-methyl-1,2,3,4-tetrahydroquinoline.

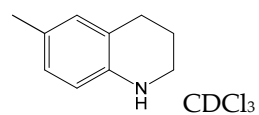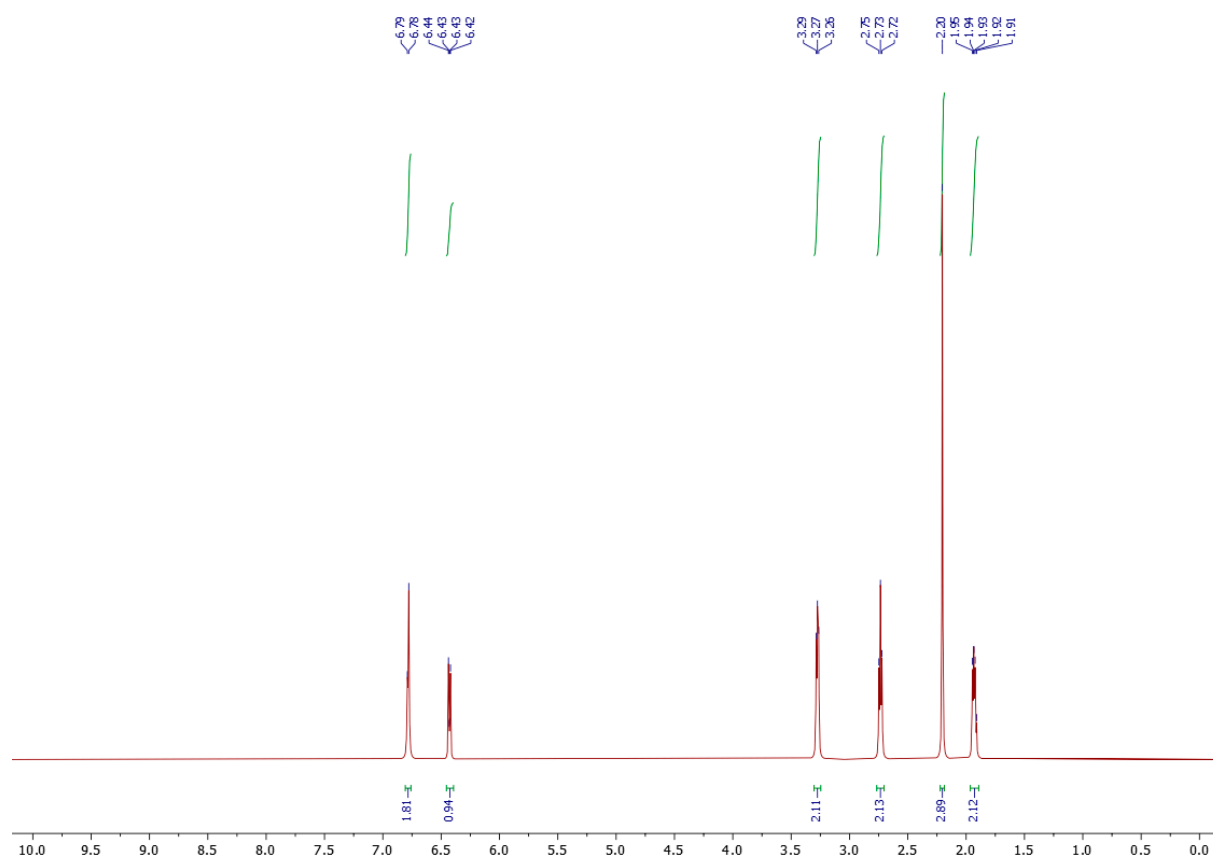

Figure S20. <sup>1</sup>H NMR spectrum of 6-methyl-1,2,3,4-tetrahydroquinoline

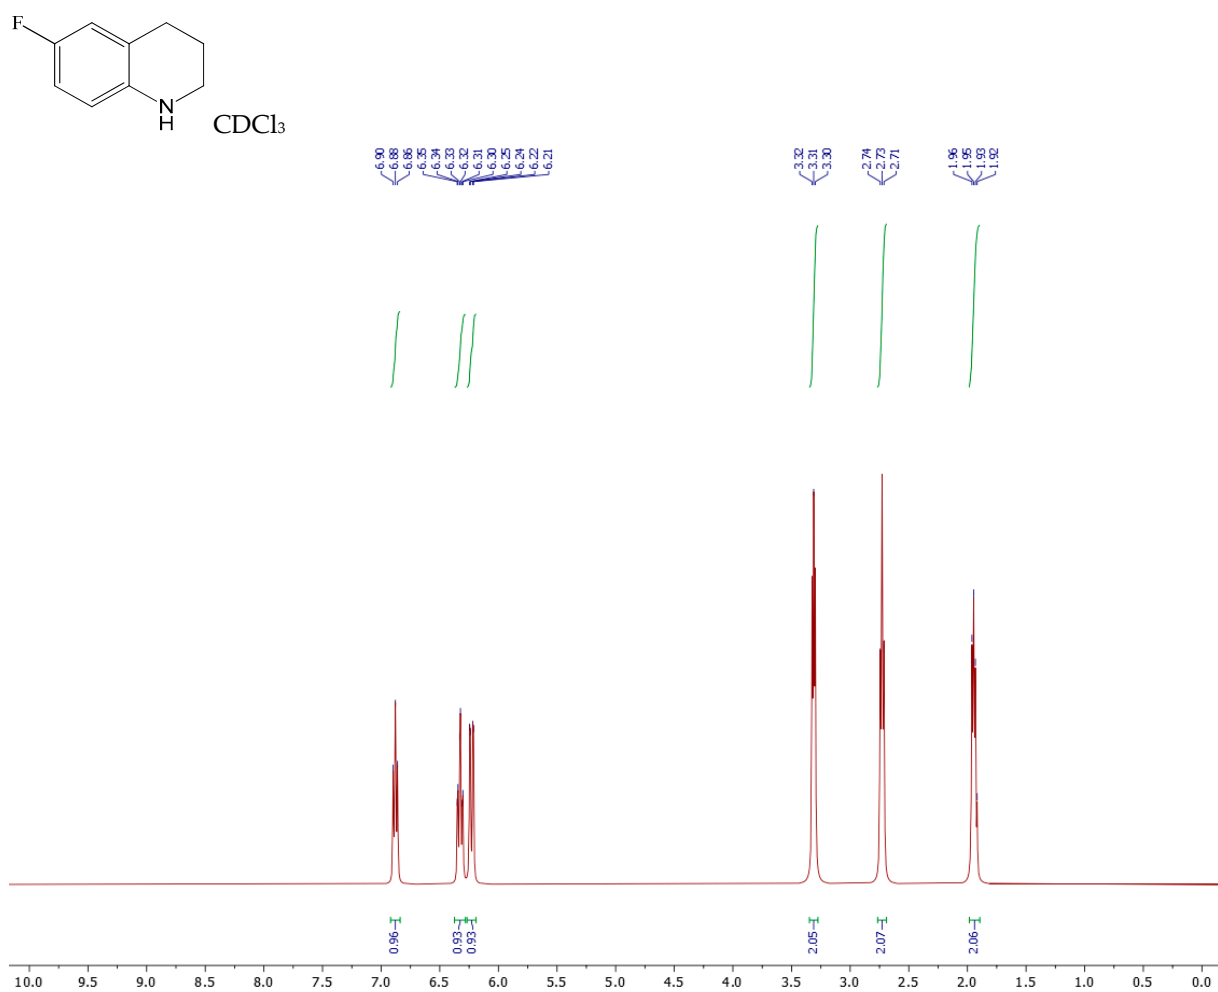

Figure S21.  $^1\text{H}$  NMR spectrum of 6-fluoro-1,2,3,4-tetrahydroquinoline.

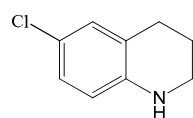

DMSO-d6

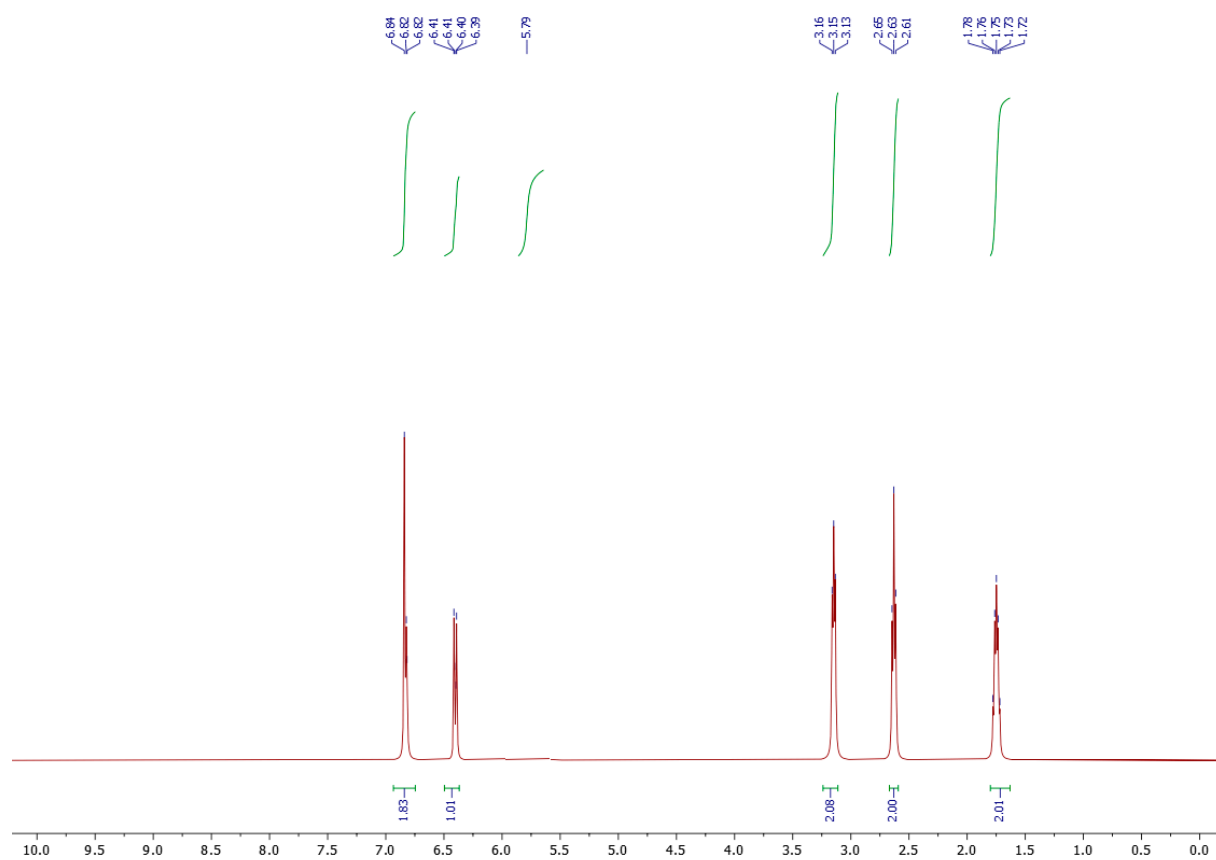

Figure S22. <sup>1</sup>H NMR spectrum of 6-chloro-1,2,3,4-tetrahydroquinoline



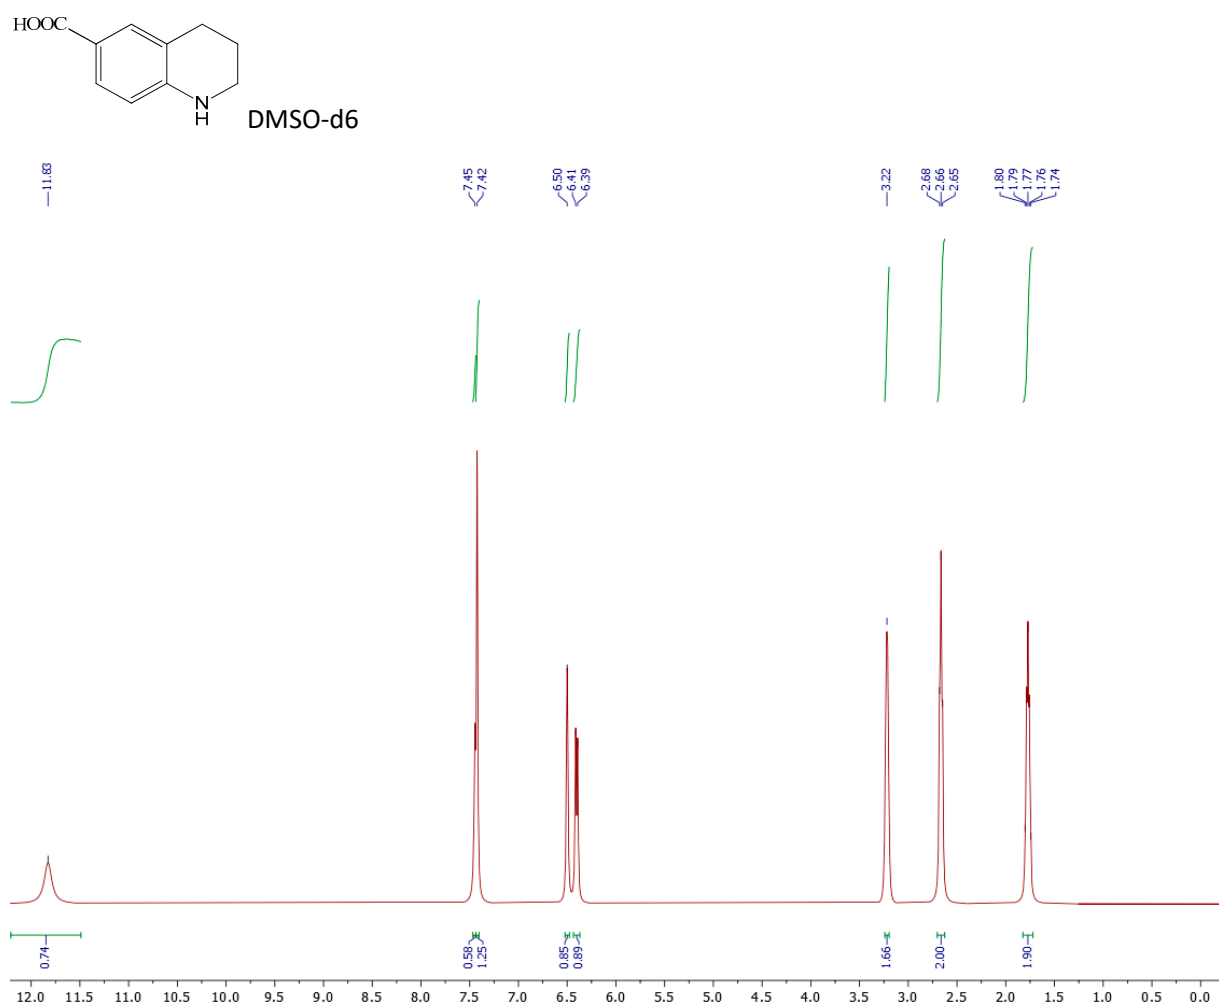

Figure S23. <sup>1</sup>H NMR spectrum of 1,2,3,4-tetrahydroquinoline-6-carboxylic acid

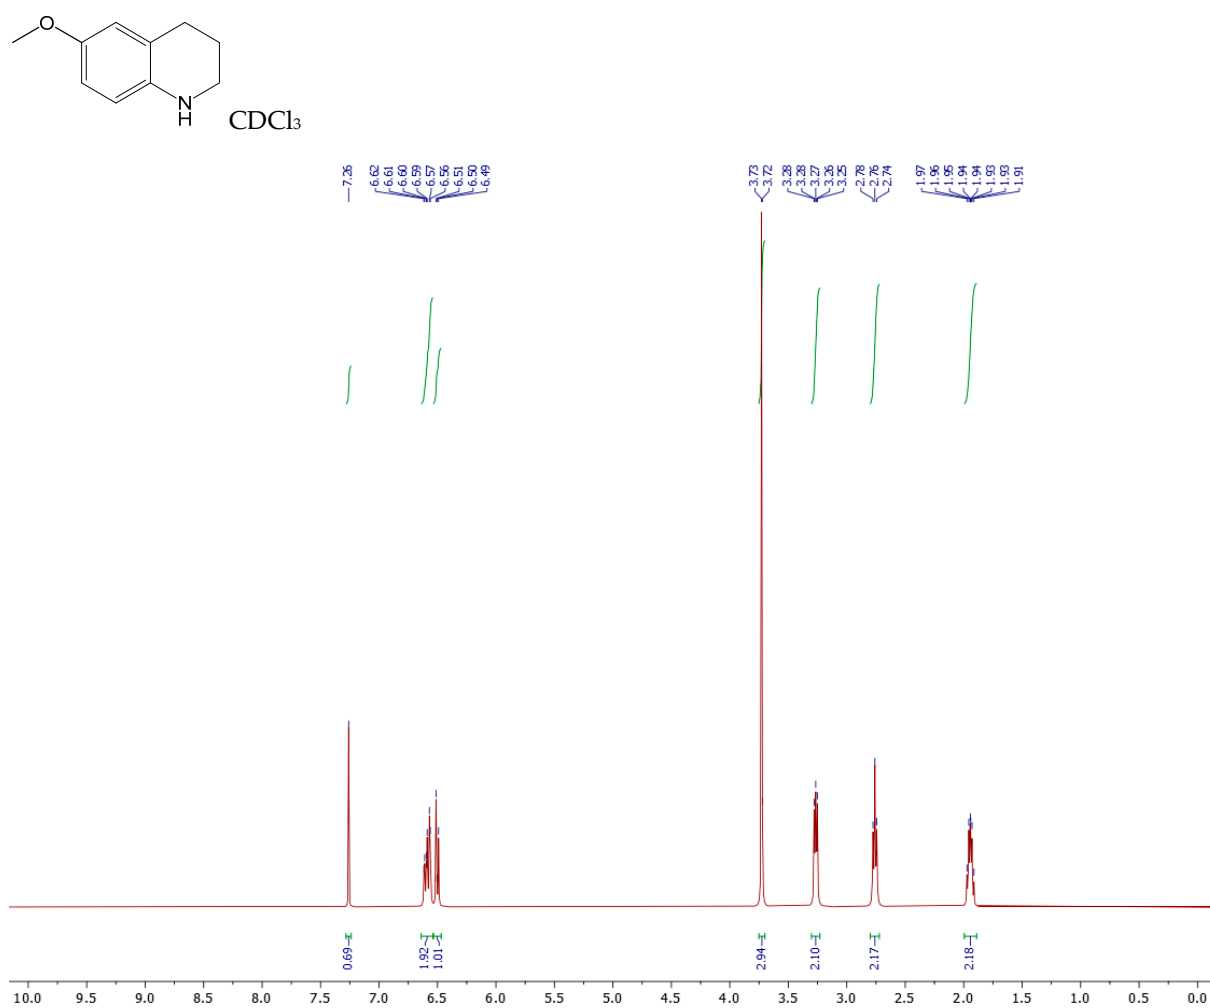

Figure S24.  $^1\text{H}$  NMR spectrum of 6-methoxy-1,2,3,4-tetrahydroquinoline

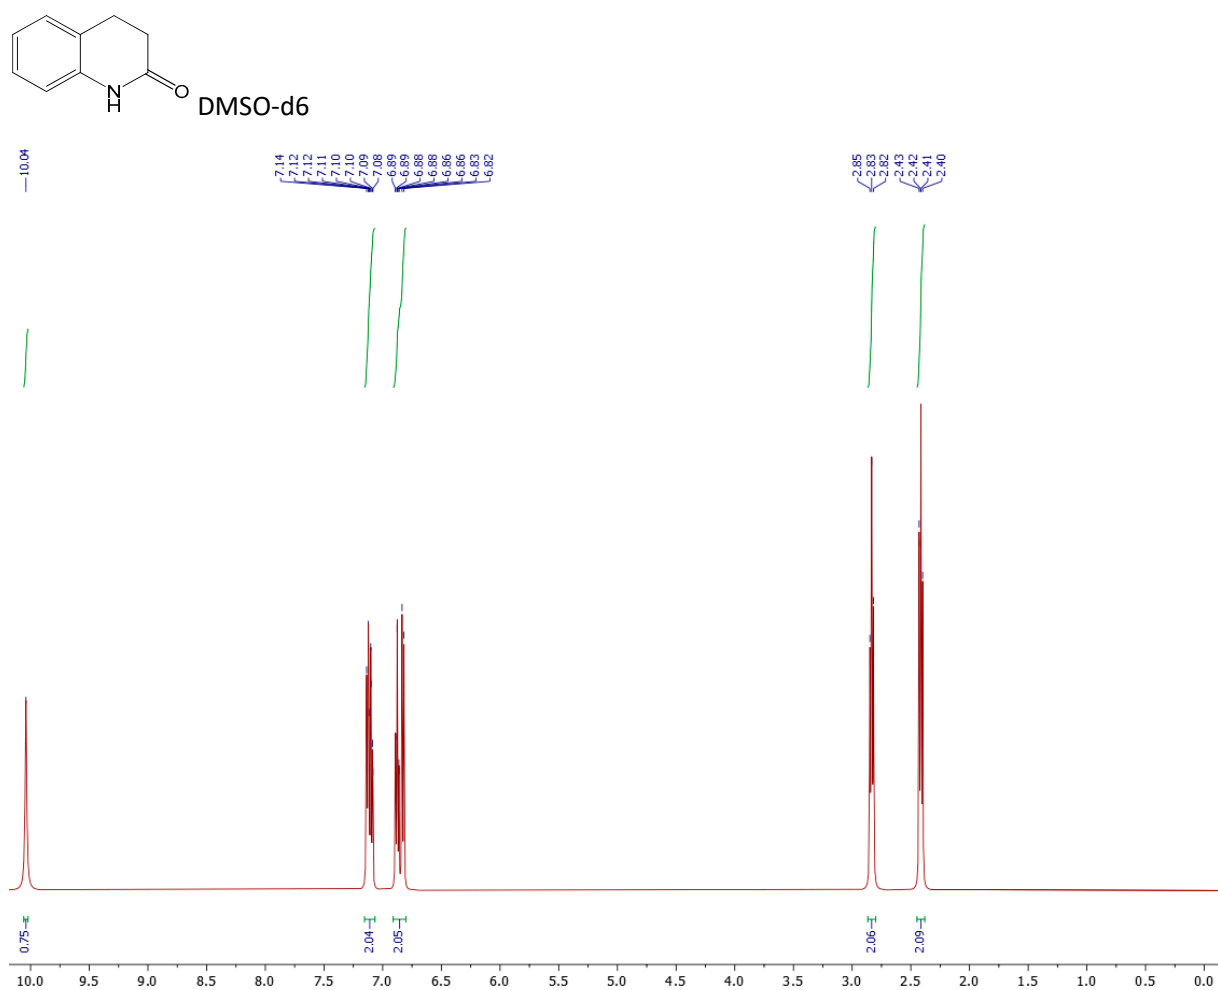

Figure S25. <sup>1</sup>H NMR spectrum of 3,4-dihydroquinolin-2(1H)-one

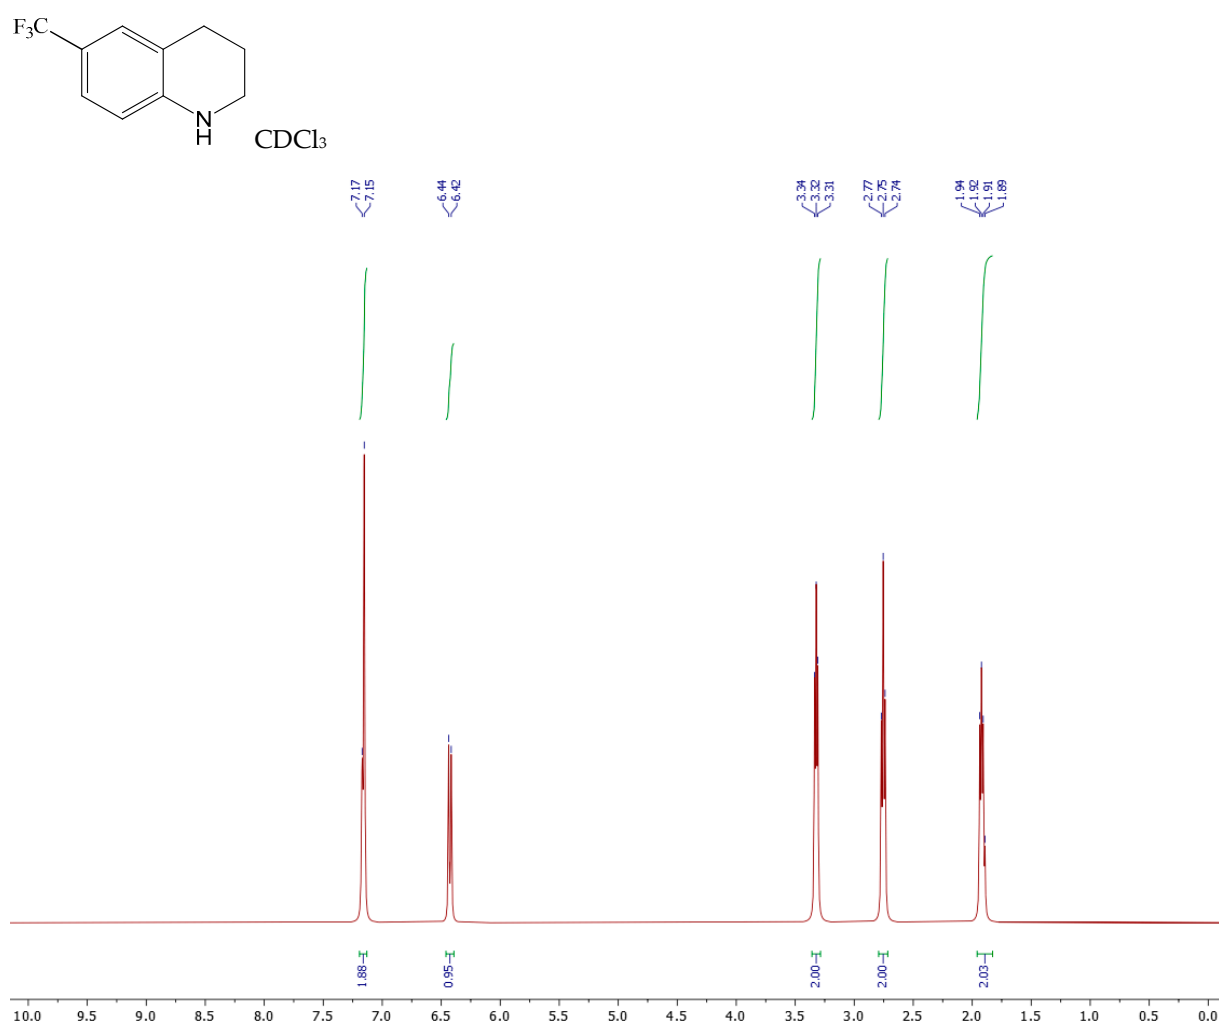

Figure S26.  $^1\text{H}$  NMR spectrum of 6-(trifluoromethyl)-1,2,3,4-tetrahydroquinoline

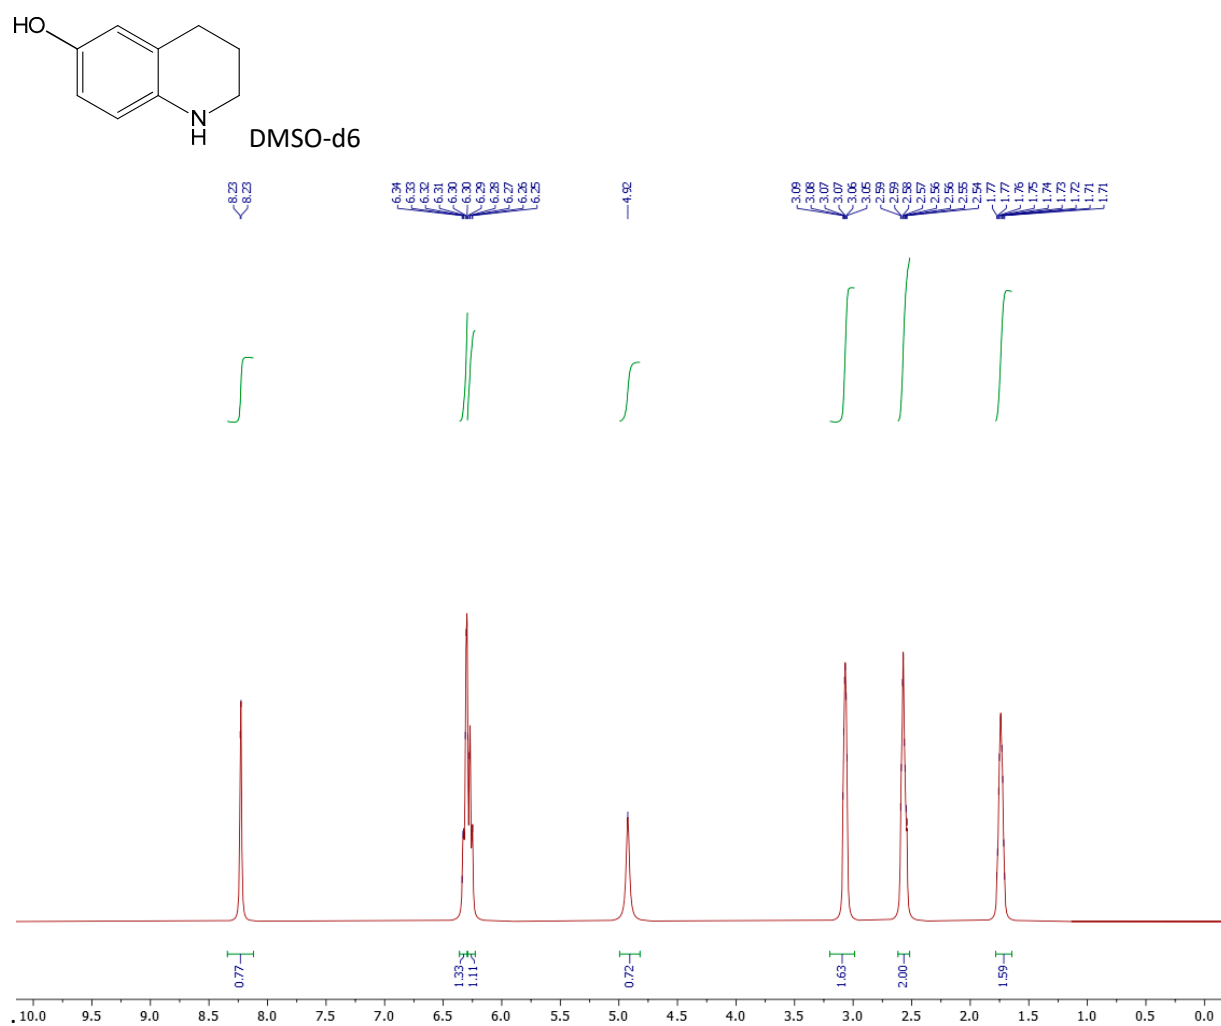

Figure S27.  $^1\text{H}$  NMR spectrum of 1,2,3,4-tetrahydroquinolin-6-ol

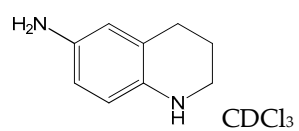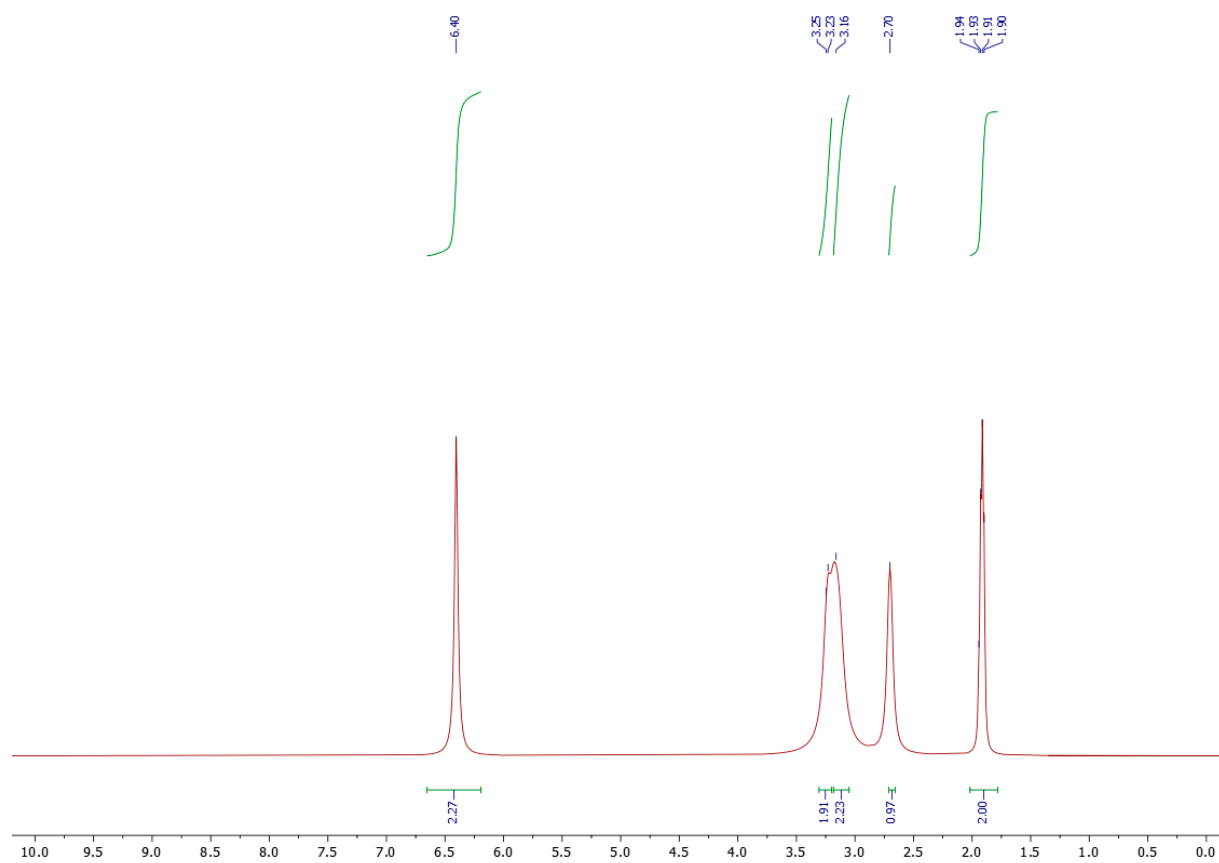

Figure S28.  $^1\text{H}$  NMR spectrum of 1,2,3,4-tetrahydroquinolin-6-amine

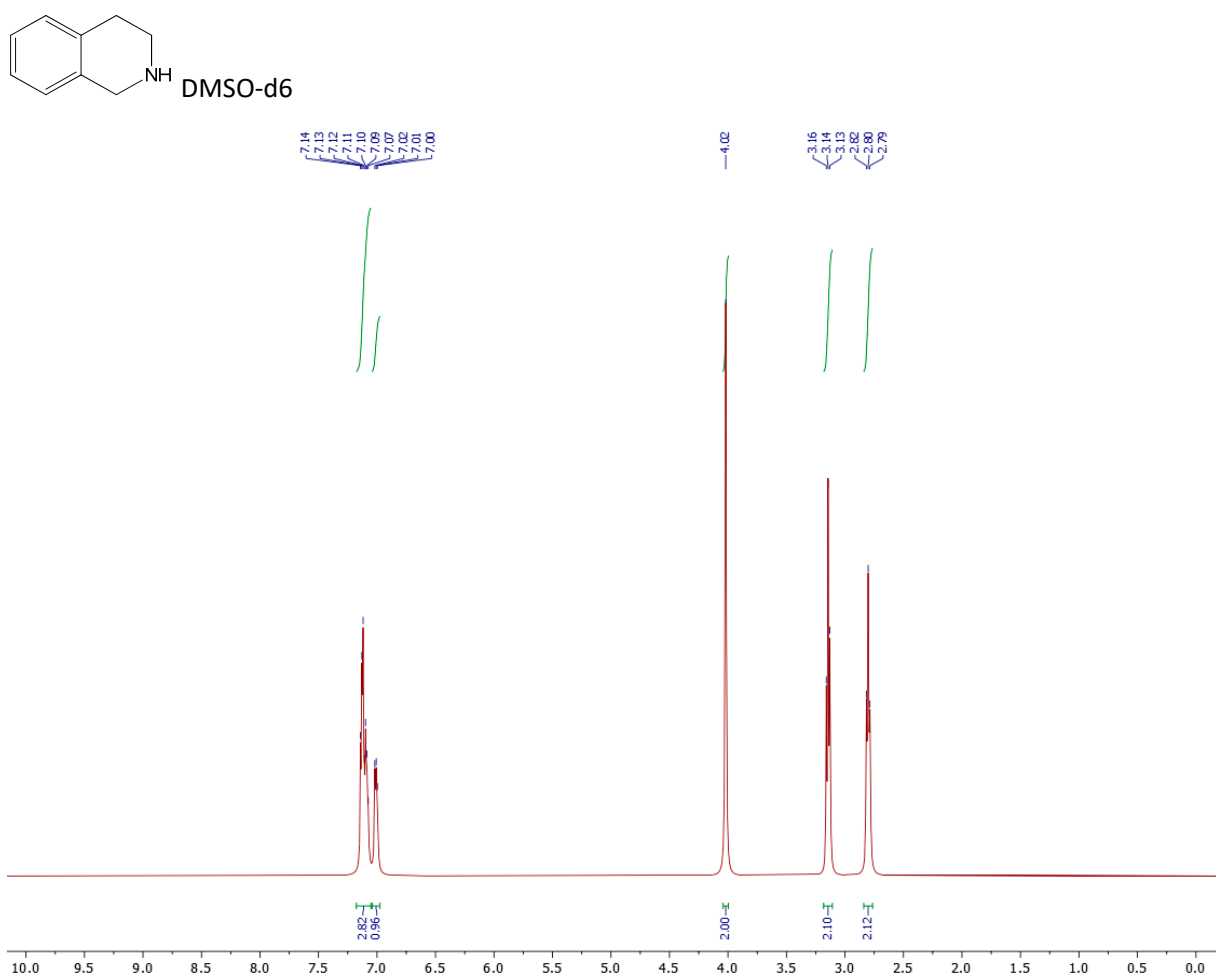

Figure S29.  $^1\text{H}$  NMR spectrum of 1,2,3,4-tetrahydroisoquinoline
